# Supplementary material
Source: Springer Nature journal article supplement (https://www.springermedizin.de/resource/supplementary/12913_2013_3430_MOESM2_ESM.pdf/9532820)

# PRISMA 2009 Flow Diagram

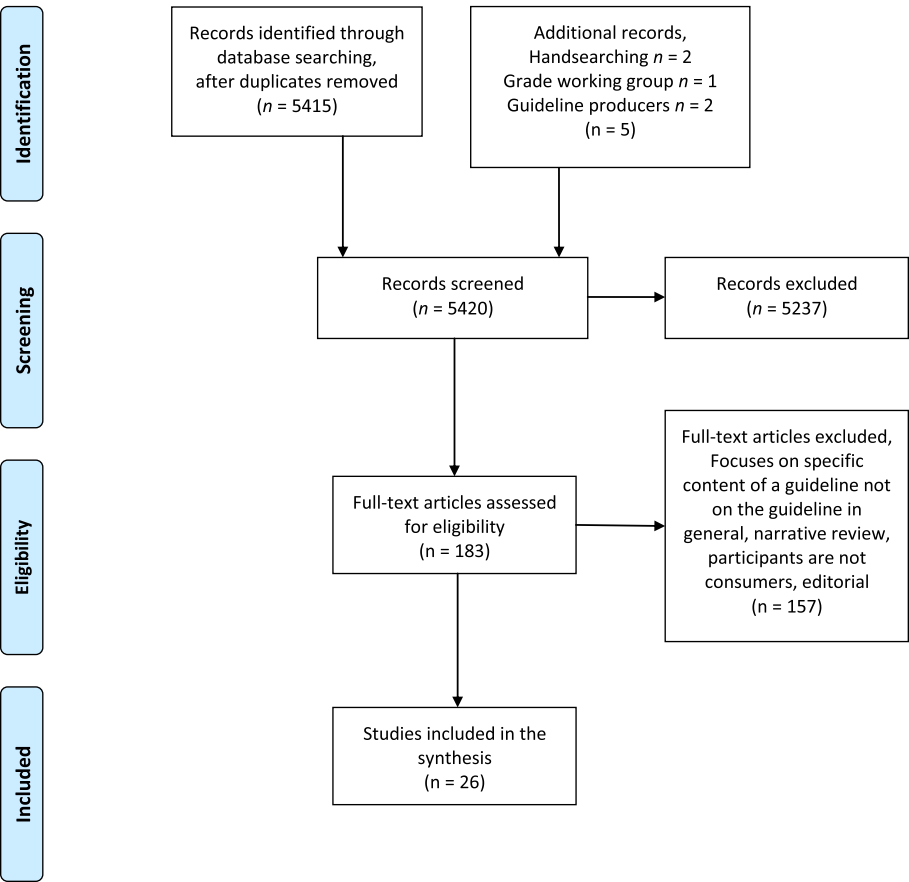

Supplement: MOESM2 [file 9532820]
